# Supplementary material for: Upregulation of BCAM and its sense lncRNA BAN are associated with gastric cancer metastasis and poor prognosis
Source: PubMed Central journal article supplement (PMC7138403; doi:10.1002/1878-0261.12638), 2020-02-13

A

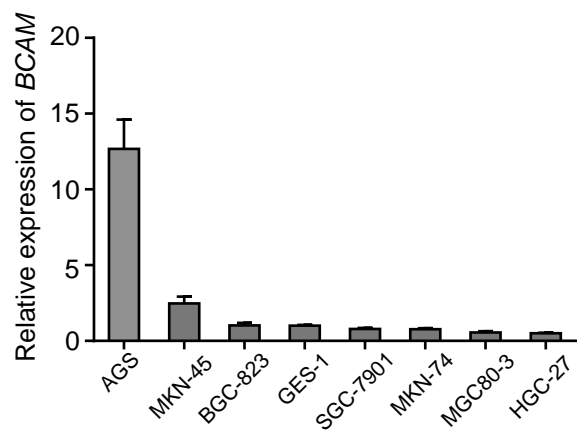

B

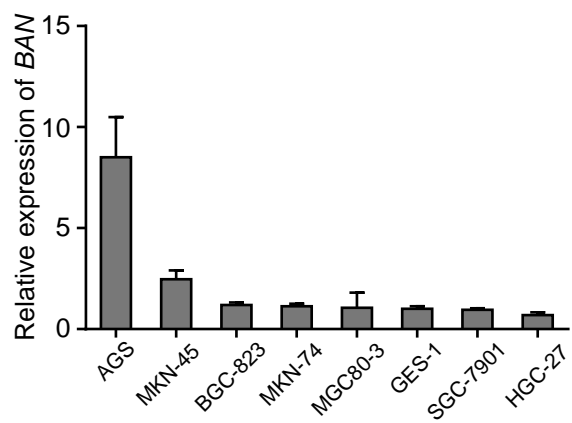

Supplement: MOL2-14-829-s001.pdf [file MOL2-14-829-s001.pdf]
